# Supplementary material
Source: PubMed Central journal article supplement (PMC6326778)
Supplement: NIHMS1506799-supplement-006558_-_Supplemental_Material.pdf [file NIHMS1506799-supplement-006558_-_Supplemental_Material.pdf]

## SUPPLEMENTAL MATERIAL

### Model Stimulation Protocol

Table S1: Model Protocol Values

| Model    | Species      | Beats to Steady State for 1Hz pacing | Stimulus Amplitude (mA/mF) |
|----------|--------------|--------------------------------------|----------------------------|
| Fox      | Canine       | 35                                   | -36.4                      |
| Hund     | Canine       | 855                                  | -32.2                      |
| Heijman  | Canine       | No ISO = 421; ISO @ 1mM = 388        | -36.7                      |
| Shannon  | Rabbit       | 183                                  | -35                        |
| Livshitz | Guinea Pig   | 1170                                 | -35                        |
| Devenyi  | Guinea Pig   | 317                                  | -30.9                      |
| TT04     | Human (endo) | 1                                    | -25                        |
| TT06     | Human (endo) | 191                                  | -22.6                      |
| Grandi   | Human (endo) | 270                                  | -32.2                      |
| Ohara    | Human (endo) | 124                                  | -20.6                      |

## Model Parameters

### Canine Models

**Table S2: Parameters varied in Fox Model**

Fox Model is based on experimental data collected from canine midmyocardial cells.

| Parameter        | Definition                                                                | Baseline value                        |
|------------------|---------------------------------------------------------------------------|---------------------------------------|
| $\bar{G}_{Na}$   | Maximal Na <sup>+</sup> conductance                                       | 12.8 mS/ $\mu$ F                      |
| $\bar{G}_{Nab}$  | Maximal Background Na <sup>+</sup> conductance                            | 0.0031 mS/ $\mu$ F                    |
| $\bar{P}_{Ca}$   | L-type Ca <sup>2+</sup> current permeability to Ca <sup>2+</sup>          | 2.26 x 10 <sup>-5</sup> cm/ms         |
| $\bar{P}_{CaK}$  | L-type Ca <sup>2+</sup> current permeability to K <sup>+</sup>            | 5.79 x10 <sup>-7</sup> cm/ms          |
| $\bar{G}_{Cab}$  | Maximal background Ca <sup>2+</sup> conductance                           | 3.84 x10 <sup>-4</sup> mS/ $\mu$ F    |
| $\bar{G}_{to}$   | Maximal transient outward K <sup>+</sup> conductance                      | 0.23815 mS/ $\mu$ F                   |
| $\bar{G}_{Kr}$   | Rapid delayed rectifier K <sup>+</sup> current scaling factor*            | 0.0136 mS/ $\mu$ F                    |
| $\bar{G}_{Ks}$   | Maximal slow delayed rectifier K <sup>+</sup> conductance                 | 0.0245 mS/ $\mu$ F                    |
| $\bar{G}_{K1}$   | Maximal inward rectifier K <sup>+</sup> conductance                       | 2.8 mS/ $\mu$ F                       |
| $\bar{G}_{Kp}$   | Maximal plateau K <sup>+</sup> conductance                                | 0.002216 mS/ $\mu$ F                  |
| $\bar{I}_{NaK}$  | Maximal Na <sup>+</sup> -K <sup>+</sup> pump current                      | 0.693 $\mu$ A/ $\mu$ F                |
| $k_{NaCa}$       | Maximal Na <sup>+</sup> -Ca <sup>2+</sup> exchange current scaling factor | 1500 $\mu$ A/ $\mu$ F                 |
| $\bar{P}_{rel}$  | Maximal SR Ca <sup>2+</sup> release permeability scaling factor           | 6 ms <sup>-1</sup>                    |
| $\bar{P}_{leak}$ | Passive SR Ca <sup>2+</sup> leak permeability scaling factor              | 1 x 10 <sup>-6</sup> ms <sup>-1</sup> |
| $V_{up}$         | Maximal rate of SR Ca <sup>2+</sup> uptake (SERCA)                        | 0.1 $\mu$ M/ms                        |
| $\bar{I}_{pCa}$  | Maximal sarcolemmal Ca <sup>2+</sup> pump current                         | 0.05 $\mu$ A/ $\mu$ F                 |

### Notes

\*The scaling factor for  $I_{Kr}$  is not formally a maximal conductance, since this is multiplied by  $\sqrt{K_o}/4$  and can therefore be greater than this value. For a constant value of extracellular [K<sup>+</sup>], changing this factor served to scale the current.

**Table S3: Parameters varied in Hund Model**

Hund Model is based on data from canine epicardial cells.

| Parameter        | Definition                                                                                 | Baseline value                         |
|------------------|--------------------------------------------------------------------------------------------|----------------------------------------|
| $\bar{G}_{Na}$   | Maximal Na <sup>+</sup> conductance                                                        | 8.25 mS/ $\mu$ F                       |
| $\bar{G}_{Na,L}$ | Maximal late Na <sup>+</sup> conductance                                                   | $6.5 \times 10^{-3}$ mS/ $\mu$ F       |
| $P_{Ca}$         | Maximal L-type Ca <sup>2+</sup> current permeability to Ca <sup>2+</sup>                   | $2.43 \times 10^{-4}$ cm/s             |
| $P_{Ca,b}$       | Background Ca <sup>2+</sup> current permeability                                           | $1.99508 \times 10^{-7}$ cm/s          |
| $\bar{G}_{K1}$   | Inward rectifier K <sup>+</sup> conductance scaling factor*                                | 0.5 mS/ $\mu$ F                        |
| $\bar{G}_{Kr}$   | Rapid delayed rectifier K <sup>+</sup> conductance scaling factor*                         | 0.0138542 mS/ $\mu$ F                  |
| $\bar{G}_{Ks}$   | Slow delayed rectifier K <sup>+</sup> conductance scaling factor†                          | 0.02489 mS/ $\mu$ F                    |
| $\bar{G}_{Kp}$   | Maximal plateau K <sup>+</sup> conductance                                                 | $2.76 \times 10^{-3}$ mS/ $\mu$ F      |
| $\bar{G}_{to1}$  | Maximal transient outward K <sup>+</sup> conductance                                       | 0.19 mS/ $\mu$ F                       |
| $\bar{G}_{Cl,b}$ | Background Cl <sup>-</sup> conductance‡                                                    | $2.25 \times 10^{-4}$ mS/ $\mu$ F      |
| $P_{cl}$         | Maximal Ca <sup>2+</sup> -dependent transient outward Cl <sup>-</sup> current permeability | $4 \times 10^{-7}$ cm/s                |
| $\bar{G}_{NaK}$  | Maximal Na <sup>+</sup> -K <sup>+</sup> pump current                                       | 0.619 $\mu$ A/ $\mu$ F                 |
| $v_{max}$        | Maximal Na <sup>+</sup> -Ca <sup>2+</sup> exchange current                                 | 4.5 $\mu$ A/ $\mu$ F                   |
| $\bar{G}_{rel}$  | SR Ca <sup>2+</sup> release scaling factor                                                 | 3000 ms <sup>-1</sup>                  |
| $V_{up}$         | Maximal sarcolemmal Ca <sup>2+</sup> pump current                                          | $5.75 \times 10^{-2}$ $\mu$ A/ $\mu$ F |
| $\bar{I}_{up}$   | Maximal rate of SR Ca <sup>2+</sup> uptake (SERCA)                                         | $4.38 \times 10^{-3}$ mM/ms            |

### Notes

\*The scaling factors for  $I_{K1}$  and  $I_{Kr}$  are not formally maximal conductances, since each is multiplied by  $\sqrt{K_o}/5.4$  and can therefore be greater than this value. For a constant value of extracellular [K<sup>+</sup>], changing this factor served to scale the current.

†The scaling factor for  $I_{Ks}$  is not formally a maximal conductance, since it is multiplied by a function of intracellular Ca<sup>2+</sup> and can therefore be greater than this value.

‡The units for this maximal conductance are mistakenly listed as  $\mu$ A/ $\mu$ F in the original manuscript.

**Table S4: Parameters varied in Heijman Model**

| <b>Parameter</b> | <b>Definition</b>                                  | <b>Baseline value*</b> |
|------------------|----------------------------------------------------|------------------------|
| INaB             | Fast Na <sup>+</sup> Channel                       | 1                      |
| INabB            | Background Na <sup>+</sup> Channel                 | 1                      |
| INaLB            | LateNa <sup>+</sup> Channel                        | 1                      |
| ICaLB            | L-type Ca <sup>2+</sup> Channel                    | 1                      |
| ICabB            | Background Ca <sup>2+</sup> Channel                | 1                      |
| Ito1B            | Transient outward K <sup>+</sup> Channel           | 1                      |
| Ito2B            | Calcium-activated Cl <sup>-</sup> Channel          | 1                      |
| IKrB             | Rapid delayed rectifier K <sup>+</sup> Channel     | 1                      |
| IKsB             | Slow delayed rectifier K <sup>+</sup> Channel      | 1                      |
| IK1B             | Inward rectifier K <sup>+</sup> Channel            | 1                      |
| IKpB             | Plateau K <sup>+</sup> Channel                     | 1                      |
| INaKB            | Na <sup>+</sup> -K <sup>+</sup> pump current       | 1                      |
| INaCaB           | Na <sup>+</sup> -Ca <sup>2+</sup> exchange current | 1                      |
| IrelB            | SR Ca <sup>2+</sup> release                        | 1                      |
| IleakB           | Passive SR Ca <sup>2+</sup> leak                   | 1                      |
| IupB             | SR Ca <sup>2+</sup> uptake (SERCA)                 | 1                      |
| IpCaB            | Sarcolemmal Ca <sup>2+</sup> pump current          | 1                      |
| IClB             | Background Cl <sup>-</sup> channel                 | 1                      |

**Notes**

\*These variable names were present in the online version of the Heijman Model: <http://rudylab.wustl.edu/research/cell/code/AllCodes.html>. The original code had (1-IB) in front of each current equation with each baseline IB term equal to zero. We modified the code to impose variability by removing the (1-IB) with just IB and replacing its baseline value with 1.

## Guinea Pig Models

**TableS5: Parameters varied in Livshitz Model**

| Parameter         | Definition                                                                 | Baseline value                       |
|-------------------|----------------------------------------------------------------------------|--------------------------------------|
| $\bar{G}_{Na}$    | Maximal Na <sup>+</sup> conductance                                        | 16 mS/ $\mu$ F                       |
| $\bar{G}_{Na,b}$  | Background Na <sup>+</sup> conductance                                     | 0.004 mS/ $\mu$ F                    |
| $P_{Ca}$          | L-type Ca <sup>2+</sup> current permeability*                              | 5.4x10 <sup>-4</sup> cm/s            |
| $P_{Na}$          | Na <sup>+</sup> permeability of L-type Ca <sup>2+</sup> channel*           | 6.75 x 10 <sup>-7</sup> cm/s         |
| $P_K$             | K <sup>+</sup> permeability of L-type Ca <sup>2+</sup> channel*            | 1.93 x 10 <sup>-7</sup> cm/s         |
| $\bar{G}_{Ca(T)}$ | T-type Ca <sup>2+</sup> conductance                                        | 0.05 mS/ $\mu$ F                     |
| $\bar{G}_{Ca,b}$  | Background Ca <sup>2+</sup> conductance                                    | 3.016 x 10 <sup>-3</sup> mS/ $\mu$ F |
| $\bar{G}_{K1}$    | Inward rectifier K <sup>+</sup> current scaling factor <sup>†</sup>        | 0.75 mS/ $\mu$ F                     |
| $\bar{G}_{Kr}$    | Rapid delayed rectifier K <sup>+</sup> current scaling factor <sup>2</sup> | 0.02614 mS/ $\mu$ F                  |
| $\bar{G}_{Ks}$    | Slow delayed rectifier K <sup>+</sup> current scaling factor <sup>‡</sup>  | 0.433                                |
| $\bar{G}_{Kp}$    | Maximal plateau K <sup>+</sup> conductance                                 | 0.00552 mS/ $\mu$ F                  |
| $\bar{I}_{NaK}$   | Maximal Na <sup>+</sup> -K <sup>+</sup> pump current                       | 2.25 $\mu$ A/ $\mu$ F                |
| $c_1$             | Na <sup>+</sup> -Ca <sup>2+</sup> exchange current scaling factor          | 2.5x10 <sup>-4</sup>                 |
| $\alpha_{rel}$    | SR Ca <sup>2+</sup> release scaling factor                                 | 0.125                                |
| $\bar{I}_{pCa}$   | Maximal sarcolemmal Ca <sup>2+</sup> pump current                          | 1.15 $\mu$ A/ $\mu$ F                |
| $\bar{I}_{up}$    | Maximal rate of SR Ca <sup>2+</sup> uptake (SERCA)                         | 8.75x10 <sup>-3</sup> mM/ms          |

### Notes

\* $P_{Ca}$ ,  $P_{Na}$ ,  $P_K$  values were retrieved from <http://rudylab.wustl.edu/research/cell/lrd2.htm> and are different from the ones in the paper.

<sup>†</sup>The scaling factors for  $I_{K1}$  and  $I_{Kr}$  are not formally maximal conductances, since each is multiplied by  $\sqrt{K_o}/5.4$  and can therefore be greater than this value. For a constant value of extracellular [K<sup>+</sup>], changing this factor served to scale the current.

<sup>‡</sup>The scaling factor for  $I_{Ks}$  is not formally a maximal conductance, and is based on a function of intracellular [Ca<sup>2+</sup>] and can therefore be greater than this value.  $\bar{G}_{Ks} = 0.433 +$

$$\frac{0.2598}{1 + (38e^{-\frac{6}{[Ca^{2+}]_i}})^{1.4}}$$

**Table S6: Parameters varied in Devenyi Model**

| Parameter         | Definition                                                                | Baseline value                       |
|-------------------|---------------------------------------------------------------------------|--------------------------------------|
| $\bar{G}_{Na}$    | Maximal Na <sup>+</sup> conductance                                       | 15.4681mS/ $\mu$ F                   |
| $\bar{G}_{Na,b}$  | Background Na <sup>+</sup> conductance                                    | 0.008mS/ $\mu$ F                     |
| $P_{Ca}$          | L-type Ca <sup>2+</sup> current permeability                              | 5.4x10 <sup>-4</sup> cm/s            |
| $P_{Na}$          | Na <sup>+</sup> permeability of L-type Ca <sup>2+</sup> channel           | 6.75 x 10 <sup>-7</sup> cm/s         |
| $P_K$             | K <sup>+</sup> permeability of L-type Ca <sup>2+</sup> channel            | 1.93 x 10 <sup>-7</sup> cm/s         |
| $\bar{G}_{Ca(T)}$ | T-type Ca <sup>2+</sup> conductance                                       | 0.0161mS/ $\mu$ F                    |
| $\bar{G}_{Ca,b}$  | Background Ca <sup>2+</sup> conductance                                   | 4.7 x10 <sup>-3</sup> mS/ $\mu$ F    |
| $\bar{G}_{K1}$    | Inward rectifier K <sup>+</sup> current scaling factor*                   | 0.8047mS/ $\mu$ F                    |
| $\bar{G}_{Kr}$    | Rapid delayed rectifier K <sup>+</sup> current scaling factor*            | 0.0466mS/ $\mu$ F                    |
| $\bar{G}_{Ks}$    | Slow delayed rectifier K <sup>+</sup> current scaling factor <sup>†</sup> | 0.0183                               |
| $\bar{G}_{Kp}$    | Maximal plateau K <sup>+</sup> conductance                                | 3.252 x 10 <sup>-4</sup> mS/ $\mu$ F |
| $\bar{I}_{NaK}$   | Maximal Na <sup>+</sup> -K <sup>+</sup> pump current                      | 3.7004 $\mu$ A/ $\mu$ F              |
| $c_1$             | Na <sup>+</sup> -Ca <sup>2+</sup> exchange current scaling factor         | 2.74 x10 <sup>-4</sup>               |
| $\alpha_{rel}$    | SR Ca <sup>2+</sup> release scaling factor                                | 0.125                                |
| $\bar{I}_{pCa}$   | Maximal sarcolemmal Ca <sup>2+</sup> pump current                         | 0.3108 $\mu$ A/ $\mu$ F              |
| $\bar{I}_{up}$    | Maximal rate of SR Ca <sup>2+</sup> uptake (SERCA)                        | 0.0187mM/ms                          |

**Notes**

\*The scaling factors for  $I_{K1}$  and  $I_{Kr}$  are not formally maximal conductances, since each is multiplied by  $\sqrt{K_o}/5.4$  and can therefore be greater than this value. For a constant value of extracellular  $[K^+]$ , changing this factor served to scale the current.

<sup>†</sup>The scaling factor for  $I_{Ks}$  is not formally a maximal conductance, and is based on a function of intracellular  $[Ca^{2+}]$  and can therefore be greater than this value.  $\bar{G}_{Ks} = 0.433 +$

$$\frac{0.2598}{1+(38e^{-\frac{6}{[Ca^{2+}]_i}})^{1.4}}$$

## Rabbit Model

**Table S7: Parameters varied in Shannon Model**

| Parameter               | Definition                                                                 | Baseline value                            |
|-------------------------|----------------------------------------------------------------------------|-------------------------------------------|
| $\bar{G}_{\text{INa}}$  | Maximal conductance of fast Na <sup>+</sup> current                        | 16 mS/ $\mu$ F                            |
| $\bar{G}_{\text{NaBk}}$ | Maximal conductance of background Na <sup>+</sup> current                  | 0.297 x 10 <sup>-3</sup> mS/ $\mu$ F      |
| $P_{\text{Ca}}$         | Permeability of L-Type Ca <sup>2+</sup> channel to Ca <sup>2+</sup>        | 5.4 x 10 <sup>-4</sup> cm/s               |
| $\bar{G}_{\text{CaBk}}$ | Maximal conductance of background Ca <sup>2+</sup> current                 | 0.0002513 mS/ $\mu$ F                     |
| $G_{\text{to},s}$       | Maximal conductance of slow transient K <sup>+</sup> current *             | 0.06mS/ $\mu$ F                           |
| $G_{\text{to},f}$       | Maximal conductance of fast transient K <sup>+</sup> current *             | 0.02mS/ $\mu$ F                           |
| $\bar{G}_{\text{IKs}}$  | Slow delayed rectifier K <sup>+</sup> current scaling factor <sup>†</sup>  | 0.07 mS/ $\mu$ F                          |
| $\bar{G}_{\text{IKr}}$  | Rapid delayed rectifier K <sup>+</sup> current scaling factor <sup>‡</sup> | 0.03 mS/ $\mu$ F                          |
| $\bar{G}_{\text{K1}}$   | Inward rectifier K <sup>+</sup> current scaling factor <sup>‡</sup>        | 0.09 mS/ $\mu$ F                          |
| $\bar{G}_{\text{Cl}}$   | Maximal conductance of Ca <sup>2+</sup> dependent Cl <sup>-</sup> current  | 0.109625 mS/ $\mu$ F                      |
| $\bar{G}_{\text{ClBk}}$ | Maximal conductance of background Cl <sup>-</sup> current                  | 0.009 mS/ $\mu$ F                         |
| $\bar{I}_{\text{NaK}}$  | Maximum current through Na-K pump                                          | 1.91 A/F                                  |
| $V_{\text{max}}$        | Maximal rate of Na <sup>+</sup> -Ca <sup>2+</sup> exchanger                | 9 A/F                                     |
| $K_{\text{SRleak}}$     | Passive SR Ca <sup>2+</sup> leak scaling factor                            | 5.348 x 10 <sup>-6</sup> ms <sup>-1</sup> |
| $V_{\text{max}}$        | Maximal rate of SR Ca pump                                                 | 286 x 10 <sup>-6</sup> mM/ms              |
| $k_s$                   | SR Ca release rate constant                                                | 25 ms <sup>-1</sup>                       |
| $V_{\text{max}}$        | Maximal rate of SL Ca pump <sup>§</sup>                                    | 0.0673 A/F                                |

### Notes

\*These values were reported incorrectly in the paper, and were taken from the source code:  
<https://somapp.ucdmc.ucdavis.edu/Pharmacology/bers/>

<sup>†</sup> The scaling factor for I<sub>Ks</sub> is not formally a maximal conductance, since it is multiplied by a function of intracellular Ca<sup>2+</sup> and can therefore be greater than this value.

<sup>‡</sup> The scaling factors for I<sub>K1</sub> and I<sub>Kr</sub> are not formally maximal conductances, since each is multiplied by  $\sqrt{K_o}/5.4$  and can therefore be greater than this value. For a constant value of extracellular [K<sup>+</sup>], changing this factor served to scale the current.

<sup>§</sup> V<sub>max</sub> is 2.2  $\mu$ mol/L cytosol/sec in the paper but was converted to A/F as used in the source code: <https://somapp.ucdmc.ucdavis.edu/Pharmacology/bers/>

## Human Models

All human models are based on experimental data from endocardial cells.

**Table S8: Parameters varied in TT04 Model**

| Parameter   | Definition                                       | Baseline value                                    |
|-------------|--------------------------------------------------|---------------------------------------------------|
| $G_{Na}$    | Maximal $Na^+$ conductance                       | 14.838 mS/ $\mu$ F                                |
| $G_{bNa}$   | Background $Na^+$ conductance                    | 2.9e-4 mS/ $\mu$ F                                |
| $G_{CaL}$   | Maximal L-type $Ca^{2+}$ current permeability    | 1.75e-4 cm <sup>3</sup> / $\mu$ F s <sup>-1</sup> |
| $G_{bCa}$   | Background $Ca^{2+}$ conductance                 | 5.92e-4 mS/ $\mu$ F                               |
| $G_{to}$    | Maximal transient outward $K^+$ conductance      | 0.073mS/ $\mu$ F                                  |
| $G_{Kr}$    | Rapid delayed rectifier $K^+$ scaling factor*    | 0.096 mS/ $\mu$ F                                 |
| $G_{Ks}$    | Maximal slow delayed rectifier $K^+$ conductance | 0.245 mS/ $\mu$ F                                 |
| $G_{K1}$    | Inward rectifier $K^+$ current scaling factor *  | 5.405 mS/ $\mu$ F                                 |
| $G_{pK}$    | Maximal plateau $K^+$ conductance                | 0.0146 mS/ $\mu$ F                                |
| $P_{NaK}$   | Maximal $Na^+$ - $K^+$ pump current              | 1.362 pA/pF                                       |
| $k_{NaCa}$  | Maximal $Na^+$ - $Ca^{2+}$ exchange current      | 1000 pA/pF                                        |
| $a_{rel}$   | SR $Ca^{2+}$ release scaling factor              | 16.464 $\mu$ M ms <sup>-1</sup>                   |
| $c_{rel}$   | SR $Ca^{2+}$ release scaling factor              | 8.232 $\mu$ M ms <sup>-1</sup>                    |
| $V_{leak}$  | Passive SR leak scaling factor                   | 8e-5 ms <sup>-1</sup>                             |
| $V_{maxup}$ | Maximal rate of SR $Ca^{2+}$ uptake (SERCA)      | 0.425 $\mu$ M ms <sup>-1</sup>                    |
| $G_{pCa}$   | Maximal sarcolemmal $Ca^{2+}$ pump current       | 0.025 pA/pF                                       |

### Notes

\*The scaling factors for  $I_{Kr}$  and  $I_{K1}$  are not formally a maximal conductance, since each is multiplied by  $\sqrt{K_o}/5.4$  and can therefore be greater than this value. For a constant value of extracellular  $[K^+]$ , changing these factors serves to scale the current.



**TableS9: Parameters varied in TT06 Model**

| Parameter   | Definition                                            | Baseline value                                     |
|-------------|-------------------------------------------------------|----------------------------------------------------|
| $G_{Na}$    | Maximal $Na^+$ conductance                            | 14.838 mS/ $\mu$ F                                 |
| $G_{bNa}$   | Background $Na^+$ conductance                         | $2.9 \times 10^{-4}$ mS/ $\mu$ F                   |
| $G_{CaL}$   | Maximal L-type $Ca^{2+}$ current permeability         | $3.98 \times 10^{-5}$ cm/ $\mu$ F ms <sup>-1</sup> |
| $G_{bCa}$   | Background $Ca^{2+}$ conductance                      | $5.92 \times 10^{-4}$ mS/ $\mu$ F                  |
| $G_{to}$    | Maximal transient outward $K^+$ conductance           | 0.0730 mS/ $\mu$ F                                 |
| $G_{Kr}$    | Rapid delayed rectifier $K^+$ current scaling factor* | 0.153 mS/ $\mu$ F                                  |
| $G_{Ks}$    | Maximal slow delayed rectifier $K^+$ conductance      | 0.392 mS/ $\mu$ F                                  |
| $G_{K1}$    | Inward rectifier $K^+$ current scaling factor *       | 5.405 mS/ $\mu$ F                                  |
| $G_{pK}$    | Maximal plateau $K^+$ conductance                     | $1.46e-2$ mS/ $\mu$ F                              |
| $P_{NaK}$   | Maximal $Na^+$ - $K^+$ pump current                   | 2.724 pA/pF                                        |
| $k_{NaCa}$  | Maximal $Na^+$ - $Ca^{2+}$ exchange current           | 1000 pA/pF                                         |
| $V_{rel}$   | SR $Ca^{2+}$ release scaling factor <sup>†</sup>      | 0.102 ms <sup>-1</sup>                             |
| $V_{leak}$  | Passive SR leak scaling factor                        | $3.6 \times 10^{-4}$ ms <sup>-1</sup>              |
| $V_{maxup}$ | Maximal rate of SR $Ca^{2+}$ uptake (SERCA)           | $6.375 \times 10^{-3}$ mM ms <sup>-1</sup>         |
| $G_{pCa}$   | Maximal sarcolemmal $Ca^{2+}$ pump current            | 0.1238 pA/pF                                       |

**Notes**

\*The scaling factors for  $I_{Kr}$  and  $I_{K1}$  are not formally a maximal conductance, since each is multiplied by  $\sqrt{K_o}/5.4$  and can therefore be greater than this value. For a constant value of extracellular  $[K^+]$ , changing these factors serves to scale the current.

<sup>†</sup>Additionally,  $V_{rel} = 0.102$  ms<sup>-1</sup>, as per the source code available at <http://www-binf.bio.uu.nl/khwjtuss/SourceCodes/HVM2/>, rather than 40.8 mM ms<sup>-1</sup> as in the manuscript.

**Table S10: Parameters varied in O'Hara Model**

| Parameter              | Definition                                                          | Baseline value          |
|------------------------|---------------------------------------------------------------------|-------------------------|
| $\bar{G}_{Na,fast}$    | Maximal Na <sup>+</sup> conductance                                 | 75 mS/ $\mu$ F          |
| $\bar{G}_{Na,late}$    | Maximal late Na <sup>+</sup> conductance                            | 0.0075 mS/ $\mu$ F      |
| $\bar{G}_{to}$         | Maximal transient outward K <sup>+</sup> conductance                | 0.02 mS/ $\mu$ F        |
| $\bar{G}_{Kr}$         | Rapid delayed rectifier K <sup>+</sup> conductance scaling factor * | 0.046 mS/ $\mu$ F       |
| $\bar{G}_{Ks}$         | Slow delayed rectifier K <sup>+</sup> conductance scaling factor †  | 0.0034 mS/ $\mu$ F      |
| $\bar{G}_{K1}$         | Inward rectifier K <sup>+</sup> conductance scaling factor *        | 0.1908 mS/ $\mu$ F      |
| $\bar{G}_{NaCa}$       | Maximal Na <sup>+</sup> -Ca <sup>2+</sup> exchange current          | 0.0008 $\mu$ A/ $\mu$ F |
| $\bar{G}_{Kb}$         | Maximal conductance of background K <sup>+</sup>                    | 0.003 mS/ $\mu$ F       |
| $P_{Ca}$               | L-type Ca <sup>2+</sup> current permeability                        | 0.0001 cm/s             |
| $\bar{I}_{NaK}$        | Scales the Na <sup>+</sup> -K <sup>+</sup> ATPase current           | 30                      |
| $P_{Nab}$              | Background Na <sup>+</sup> current permeability                     | 3.75e-10 cm/s           |
| $P_{Cab}$              | Background Ca <sup>2+</sup> current permeability                    | 2.5e-8 cm/s             |
| $\bar{G}_{pCa}$        | Maximal sarcolemmal Ca <sup>2+</sup> pump current                   | 0.0005 mS/ $\mu$ F      |
| SERCA <sub>total</sub> | SR Ca <sup>2+</sup> release scaling factor §                        | 1                       |
| RyR <sub>total</sub>   | SR Ca <sup>2+</sup> uptake(SERCA) scaling factor§                   | 1                       |

**Notes**

\*The scaling factors for  $I_{K1}$  and  $I_{Kr}$  are not formally maximal conductance, since each is multiplied by  $\sqrt{K_o}/5.4$  and can therefore be greater than this value. Changing this factor scales the current at all values of extracellular [K<sup>+</sup>] while maintaining the dependence on this variable.

†The scaling factor for  $I_{Ks}$  is multiplied by a function of intracellular [Ca<sup>2+</sup>]. This value is therefore not precisely the current's maximal conductance.

‡ $\bar{I}_{NaK}$  was not labeled in the original paper and have been given these names to keep to terminology consistent.

§Parameters controlling the magnitude of SR Ca<sup>2+</sup> release through the ryanodine receptor (RyR) and through SERCA are an introduced unitless multiplier with baseline value equals to 1.00.

**Table S11: Parameters varied in Grandi Model**

| Parameter                     | Definition                                                             | Baseline value                         |
|-------------------------------|------------------------------------------------------------------------|----------------------------------------|
| $G_{Na}$                      | Maximal $Na^+$ conductance                                             | 23 mS/uF                               |
| $G_{Na_B}$                    | Background $Na^+$ conductance                                          | $0.597 \times 10^{-3}$ mS/uF           |
| $p_{Ca}$                      | Maximal L-type $Ca^{2+}$ current permeability*                         | $2.7 \times 10^{-4}$ cm/sec            |
| $G_{Ca_B}$                    | Background $Ca^{2+}$ conductance                                       | $5.513 \times 10^{-4}$ uA/uF           |
| $G_{to_{Slow}}$               | Maximal slow transient outward $K^+$ conductance                       | 0.0376 mS/uF                           |
| $G_{to_{Fast}}$               | Maximal fast transient outward $K^+$ conductance                       | 0.0014 mS/uF                           |
| $g_{Kr}$                      | Maximal rapid delayed rectifier $K^+$ current conductance <sup>2</sup> | 0.035 mS/uF                            |
| $g_{ks_{sl}} = g_{ks_{junc}}$ | Maximal slow delayed rectifier $K^+$ current conductance               | 0.0035 mS/uF                           |
| $G_{K1}$                      | Maximal inward rectifier $K^+$ conductance <sup>†,‡</sup>              | 0.35 mS/uF                             |
| $g_{kp}$                      | Maximal plateau $K^+$ conductance                                      | 0.002 mS/uF                            |
| $G_{Cl_{Ca}}$                 | Maximal $Ca^{2+}$ -activated $Cl^-$ conductance                        | 0.0548 mS/uF                           |
| $G_{Cl_B}$                    | Background $Cl^-$ conductance                                          | $9 \times 10^{-3}$ mS/uF               |
| $\bar{I}_{Na_K}$              | Maximal $Na^+$ - $K^+$ pump current                                    | 1.8 uA/uF                              |
| $\bar{I}_{NCX}$               | Maximal $Na^+$ - $Ca^{2+}$ exchange current                            | 4.5 uA/uF                              |
| $k_s$                         | SR $Ca^{2+}$ release                                                   | $25 \text{ ms}^{-1}$                   |
| $K_{leak}$                    | Passive SR $Ca^{2+}$ leak scaling factor <sup>‡</sup>                  | $5.348 \times 10^{-6} \text{ ms}^{-1}$ |
| $V_{max_{SR_{CaP}}}$          | Maximal rate of SR $Ca^{2+}$ uptake (SERCA)                            | $5.3114 \times 10^{-3}$ mM/ms          |
| $\bar{I}_{PMCA}$              | Maximal sarcolemmal $Ca^{2+}$ pump current                             | 0.0673 uA/uF                           |

**Notes**

\* $p_{Ca} = 2.7 \times 10^{-4}$  cm/sec, as per the source code available at <https://somapp.ucdmc.ucdavis.edu/Pharmacology/bers/>, rather than  $1.215 \times 10^{-4}$  cm/sec as in the manuscript.

†The scaling factors for  $I_{K1}$  and  $I_{Kr}$  are not formally maximal conductance, since each is multiplied by  $\sqrt{K_o}/5.4$  and can therefore be greater than this value. Changing this factor scales the current at all values of extracellular  $[K^+]$  while maintaining the dependence on this variable.

‡ $G_{K1}$  and  $K_{leak}$  were not labeled in the original paper and have been given these names to keep to terminology consistent.

## Population Distributions

**Table S12: Data collected during Population Runs**

| <b>Model</b>         | <b>APD Spread</b> | <b># of APs Rerun</b> |
|----------------------|-------------------|-----------------------|
| Fox                  | 0.5252            | 0                     |
| Hund                 | 0.1839            | 0                     |
| Heijman              | 0.323             | 10                    |
| Livshitz             | 0.229             | 0                     |
| Devenyi              | 0.7068            | 5                     |
| Shannon              | 0.5697            | 0                     |
| TT04                 | 0.1748            | 0                     |
| TT06                 | 0.1952            | 1                     |
| O'Hara Baseline      | 0.3482            | 0                     |
| O'Hara High $I_{Ks}$ | 0.21              | 0                     |
| O'Hara Low $I_{Ks}$  | 0.4122            | 0                     |
| Grandi               | 0.601             | 19                    |

**Table S13: Population Statistics**

| <b>Model</b>    | <b>Mean</b> | <b>Median</b> | <b>Standard Deviation</b> |
|-----------------|-------------|---------------|---------------------------|
| Fox             | 209.7       | 208.5         | 47.5                      |
| Hund            | 217.4       | 217.5         | 15.8                      |
| Heijman         | 219.3       | 215.1         | 28.8                      |
| Livshitz        | 154.8       | 155           | 13.8                      |
| Devenyi         | 171.6       | 162           | 48.9                      |
| Shannon         | 225.1       | 211.5         | 55.5                      |
| TT04            | 326.4       | 326           | 23                        |
| TT06            | 310.5       | 310           | 23.5                      |
| O'Hara Baseline | 268.9       | 268.5         | 36.2                      |
| Grandi          | 321.4       | 302           | 83.3                      |

91st Beat - First Beat with EAD

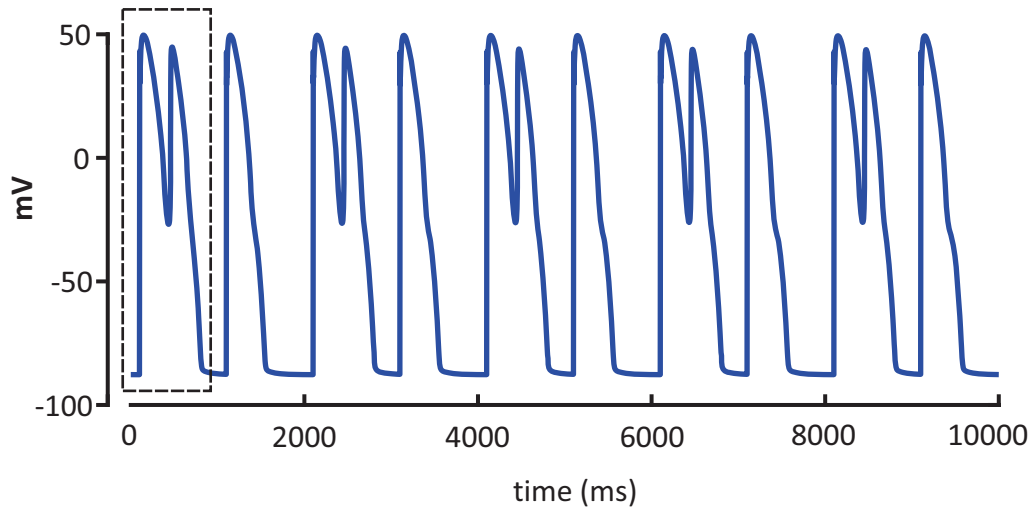

**Figure S1. Procedure to determine EAD Threshold**

AP waveforms of beats 91-100 of the O’Hara Human Model under calcium perturbation at 1 Hz-pacing rate. EAD appearance was not consistent at every beat. Thus, in order to address this variability, beats 91-100 were analyzed and the first  $I_{CaL}$  Factor that caused an EAD between beats 91-100 was considered the threshold for triggering EADs in the model. This procedure was repeated for each model. The O’Hara Model displayed an EAD first on the 91st beat at an  $I_{CaL}$  Factor of 15.2. This analysis was replicated in each model.

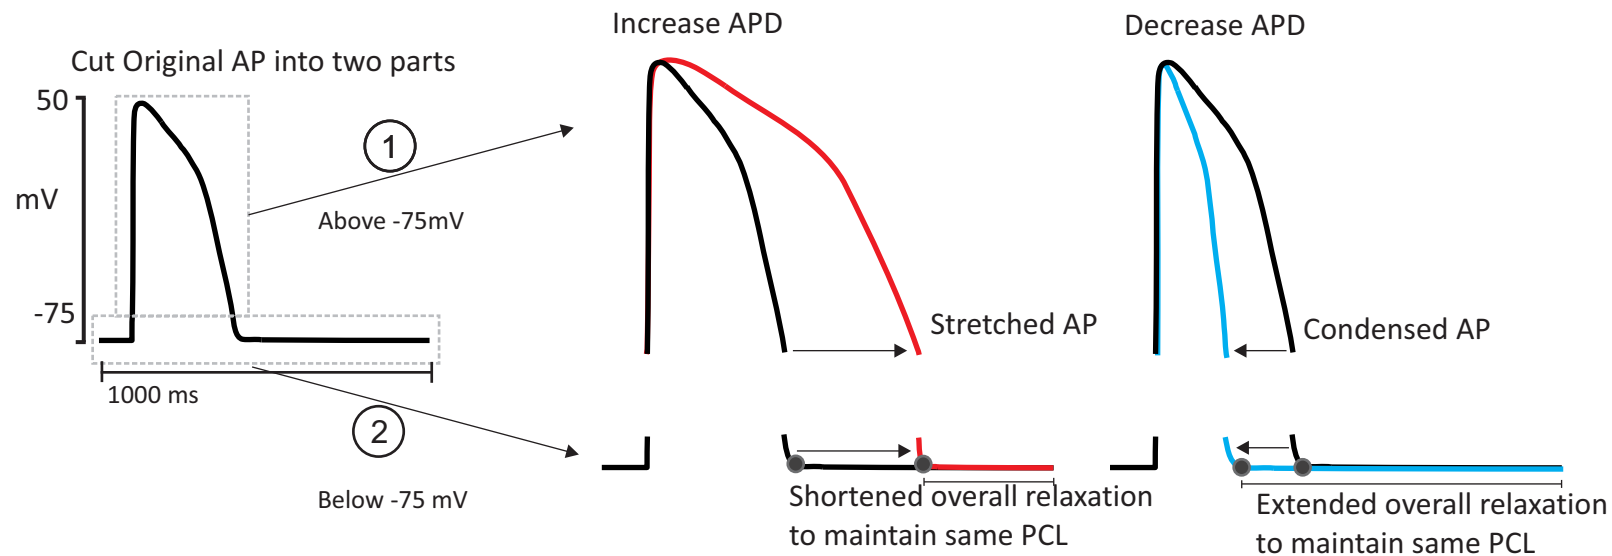

### Figure S2. AP Clamp Simulation Procedure

This represents the AP Clamp procedure performed in the O'Hara Model. The baseline model's AP waveform was split into two epochs: the depolarized period when membrane potential was more positive than -75 mV and the resting period when membrane potential was more negative than -75 mV. The two epochs were either stretched or compressed using the *interp1* function in MATLAB to make the AP longer or shorter while keeping the total duration constant at 1000 ms. This procedure was replicated in the remaining nine models.

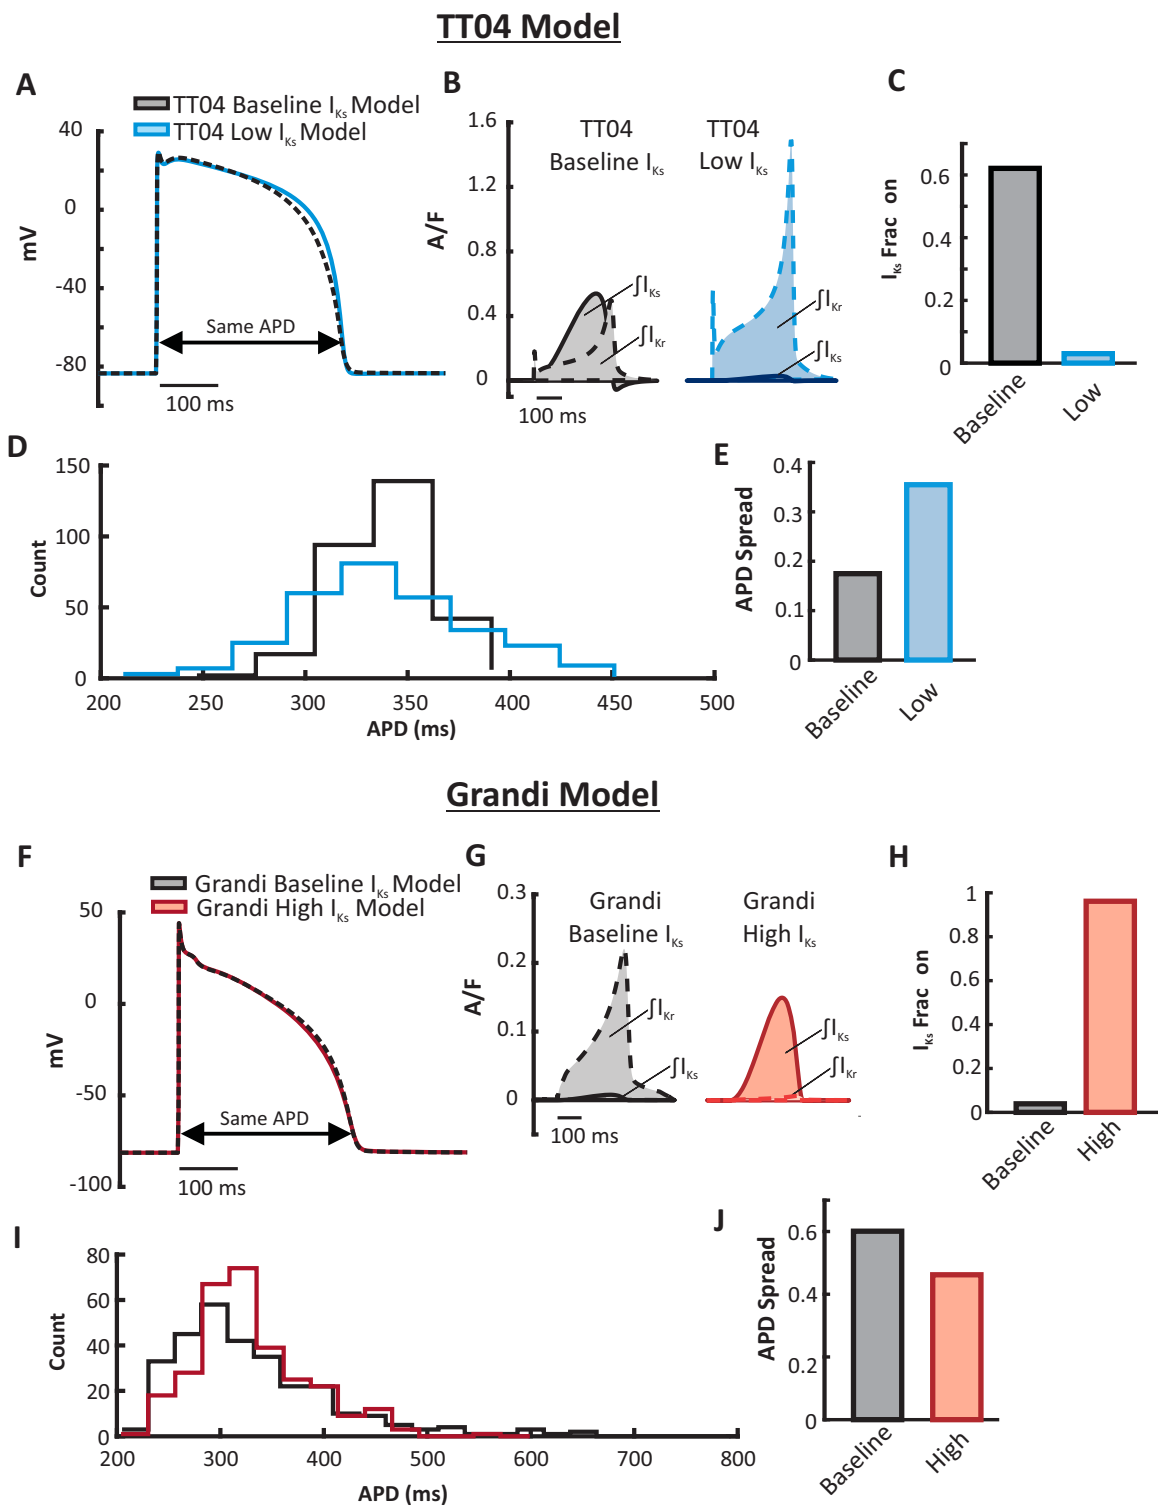

**Figure S3. Altering the contribution of  $I_{Ks}$  within the same model influences population variability.**

The same simulations performed in Figure 1 on the O'Hara model were replicated two additional human models (TT04 and Grandi). (A/F) Only a low  $I_{Ks}$  version for the TT04 model and a high  $I_{Ks}$  version for the Grandi model were developed because both of these models at baseline have very high and low levels of  $I_{Ks}$  at baseline, respectively. Thus, increasing the levels of  $I_{Ks}$  in the TT04 and decreasing the levels of  $I_{Ks}$  in the Grandi would not provide further information. The TT04 Low  $I_{Ks}$  version Grandi High  $I_{Ks}$  by decreasing or increasing (20 fold)  $I_{Ks}$  and adjusting  $I_{Kr}$  to produce an identical APD. (B/G)  $I_{Ks}$  and  $I_{Kr}$  waveforms of the different versions of the same model. The shaded regions represent the integrated currents (area under the curve, or AUC) during the APs. The current AUCs were used to calculate the fraction of repolarizing current contributed by (C/H)  $I_{Ks}$  ( $I_{Ks}$  Fraction) in each model. (D/I) Using each of the model variants as the baseline model, model populations (300 cells each) were generated by randomly varying parameters. Distributions of APD show that greater  $I_{Ks}$  promotes less variability within a population. (E/J) APD Spread was calculated for each of the populations to quantify the variability within the APD distributions.

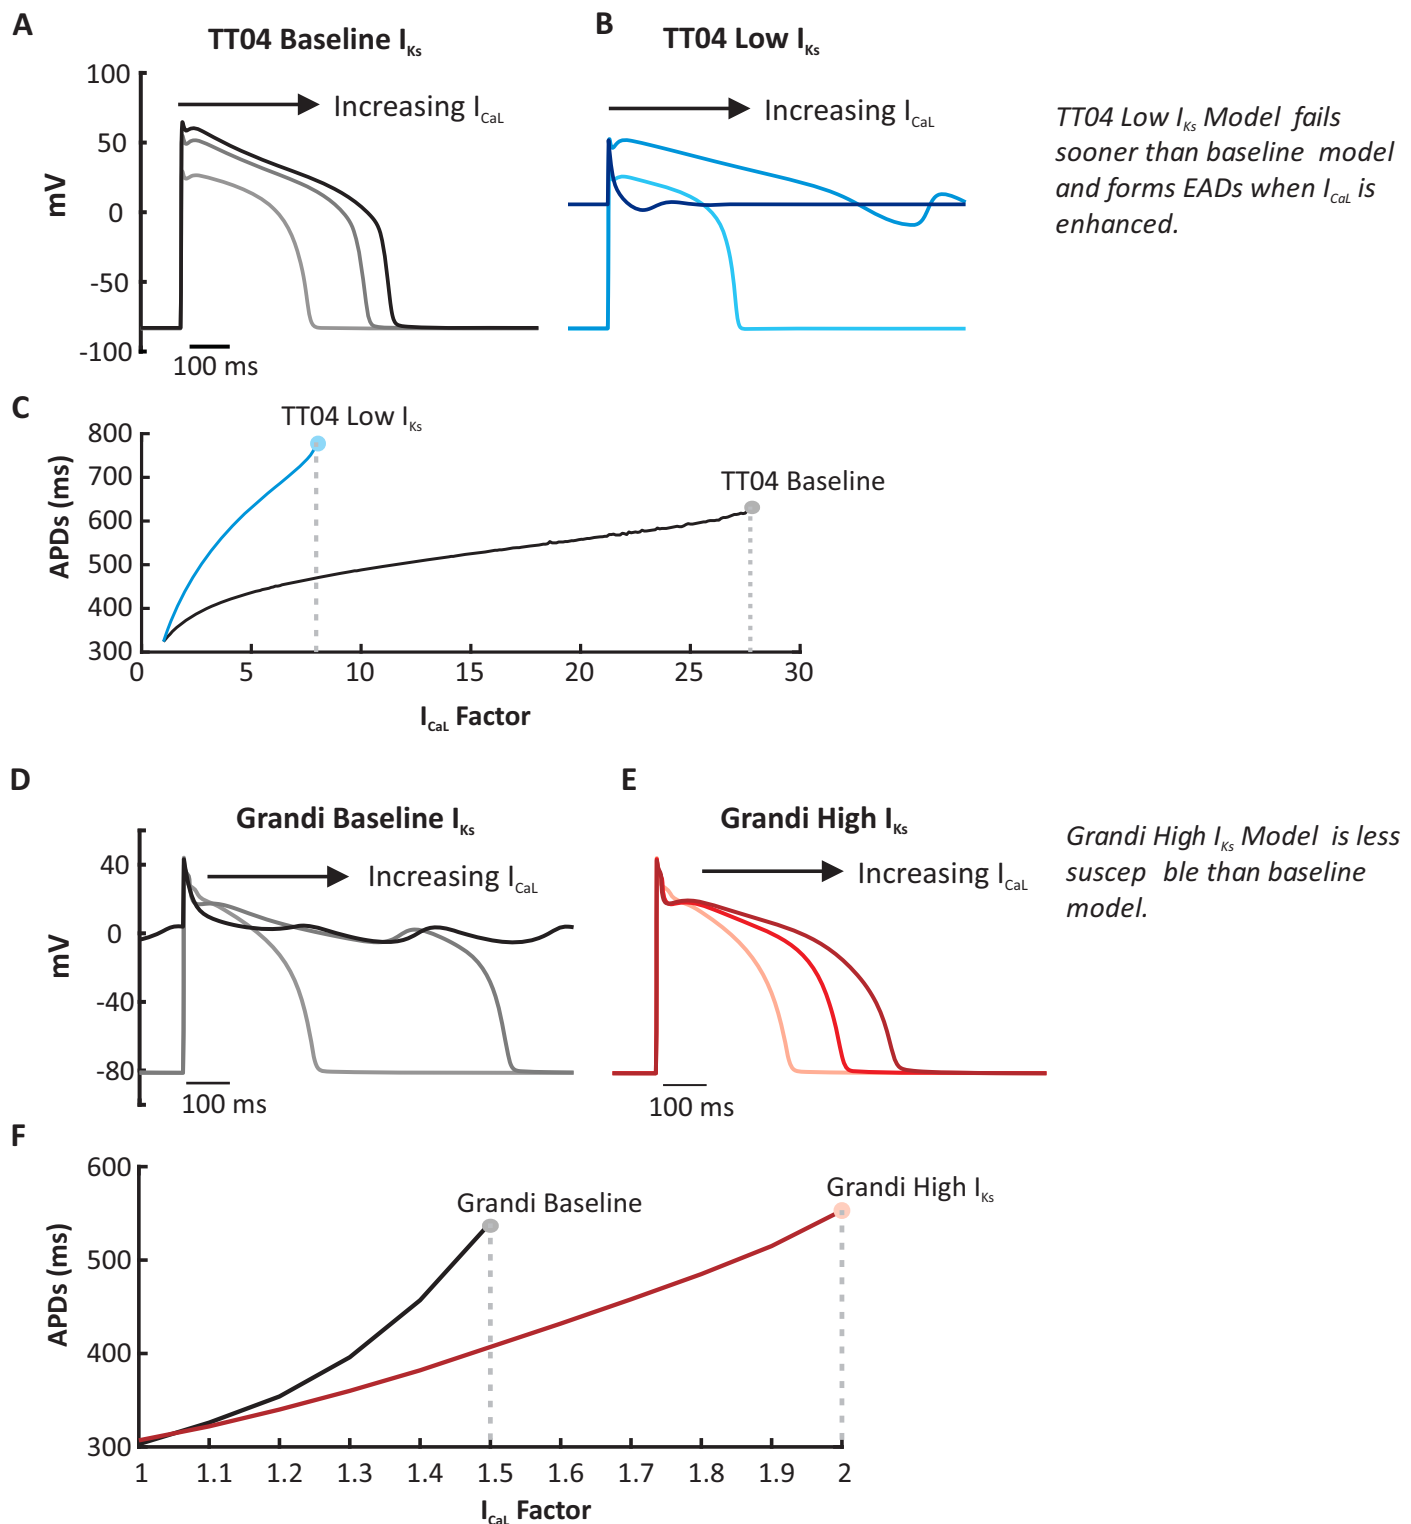

**Figure S4. Altering the contribution of  $I_{Ks}$  within the same model influences arrhythmia susceptibility.**

The same simulations performed in Figure 2 on the O'Hara model were replicated two additional human models (TT04 and Grandi).  $I_{CaL}$  was progressively increased in each model to induce EADs and arrhythmic behavior.  $I_{CaL}$  factor refers to the increase in channel permeability coefficient (1.0 equals control level). (A) APs simulated in the baseline version of TT04 with  $I_{CaL}$  augmentation (8.1 and 16.1 times). (B) APs simulated in the low TT04 model with the same  $I_{CaL}$  perturbations. (C) Both versions of the TT04 model were run under a wide range of  $I_{CaL}$  factors and plotted against APD. The end of each line represents the last factor before an EAD formed. (D) APs simulated in the baseline version of Grandi with  $I_{CaL}$  augmentation (1.6 and 2 times). (E) High  $I_{Ks}$  version of Grandi simulated under the same conditions. (F) Both versions of the Grandi model were run under a wide range of  $I_{CaL}$  factors and plotted against APD.



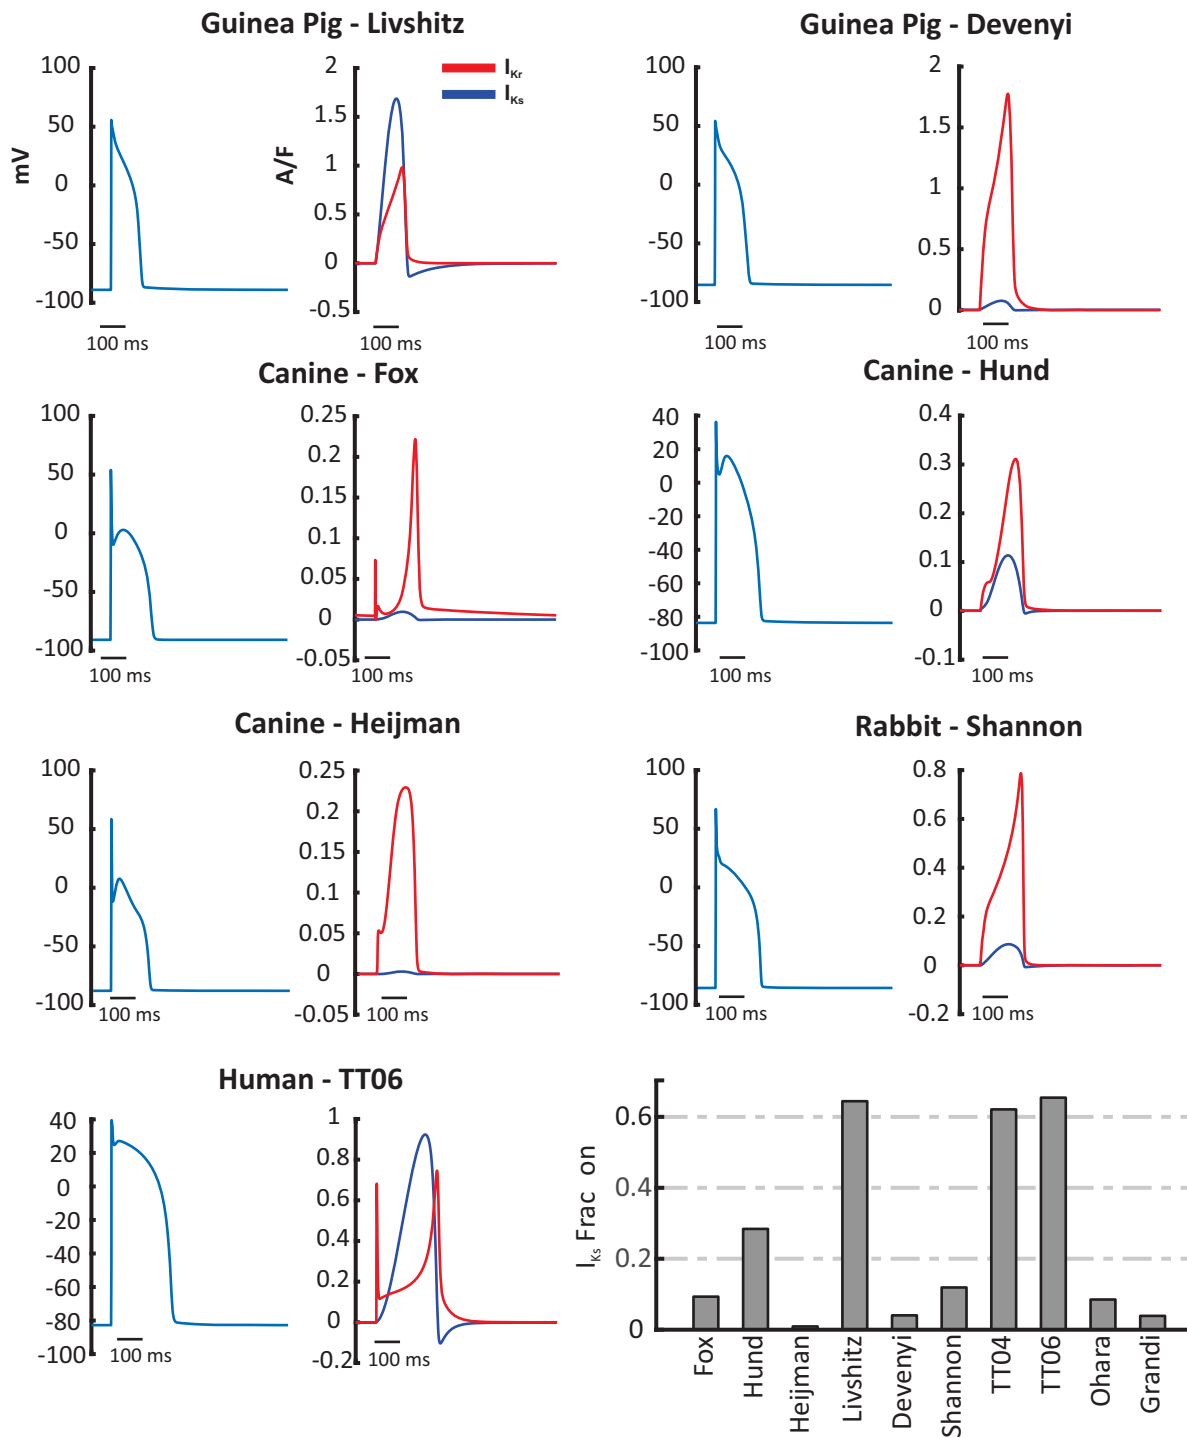

**Figure S5. Baseline AP and  $I_{Kr}/I_{Ks}$  Waveforms**

AP waveforms and slow & rapid delayed rectifier  $K^+$  currents in seven additional ventricular myocyte models. Plots show the 100th beat simulated at a 1 Hz pacing rate.

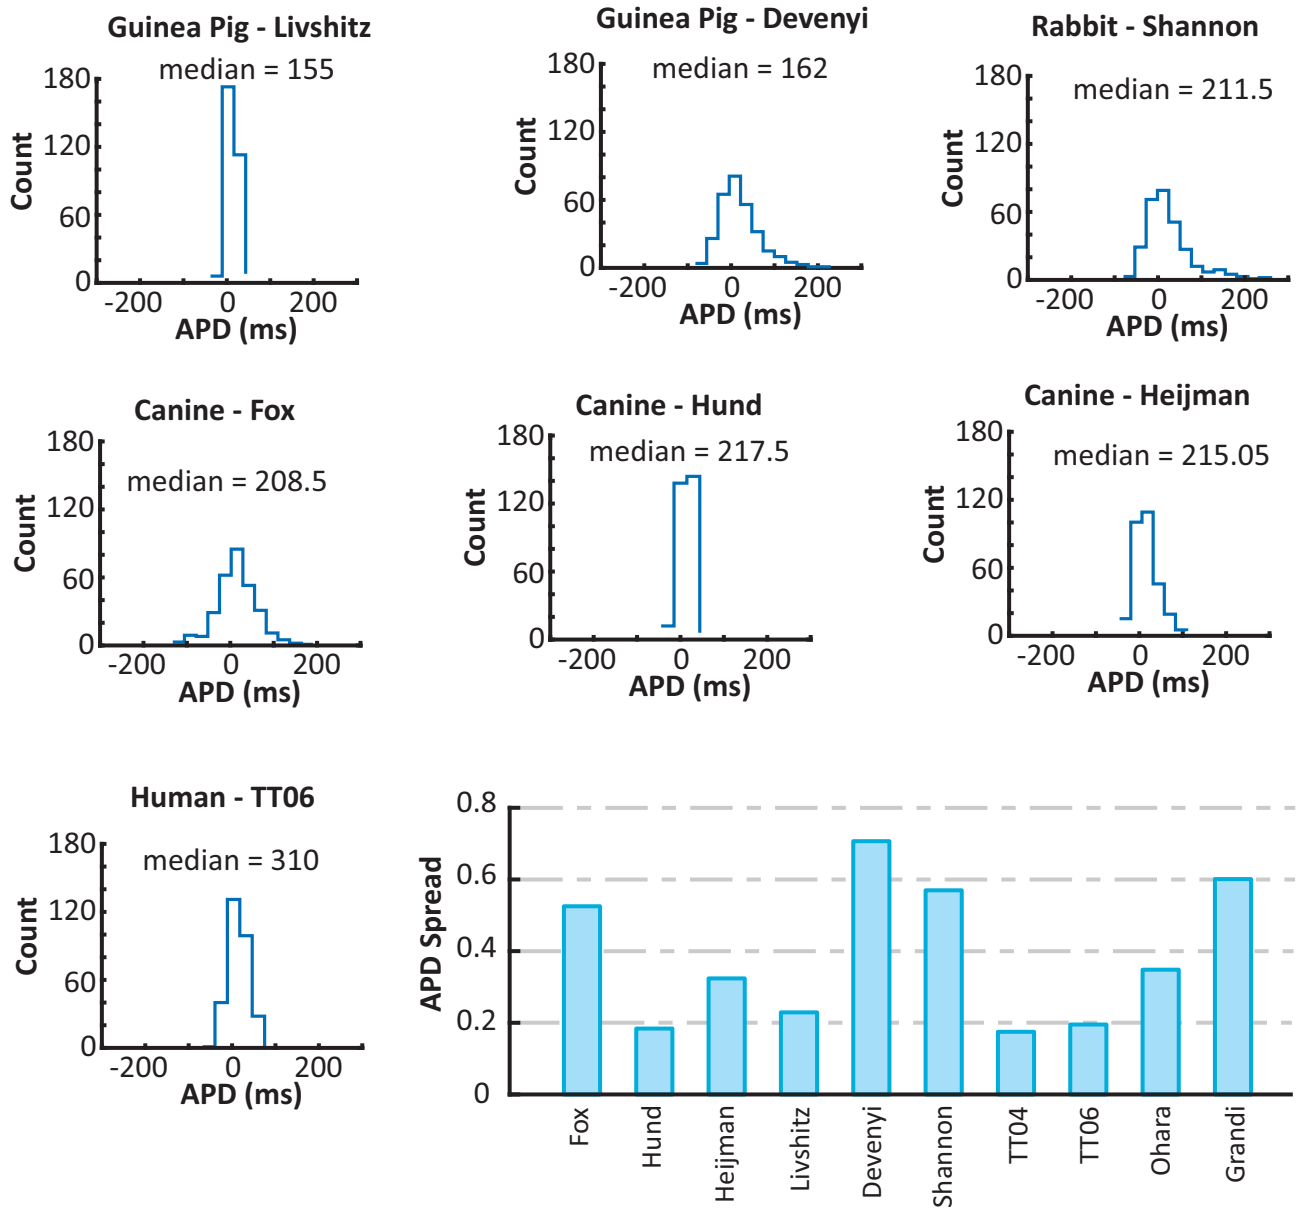

**Figure S6. Population Variability across multiple species.**

Histograms of AP duration of a population of 300 model variants generated by imposing random variability.

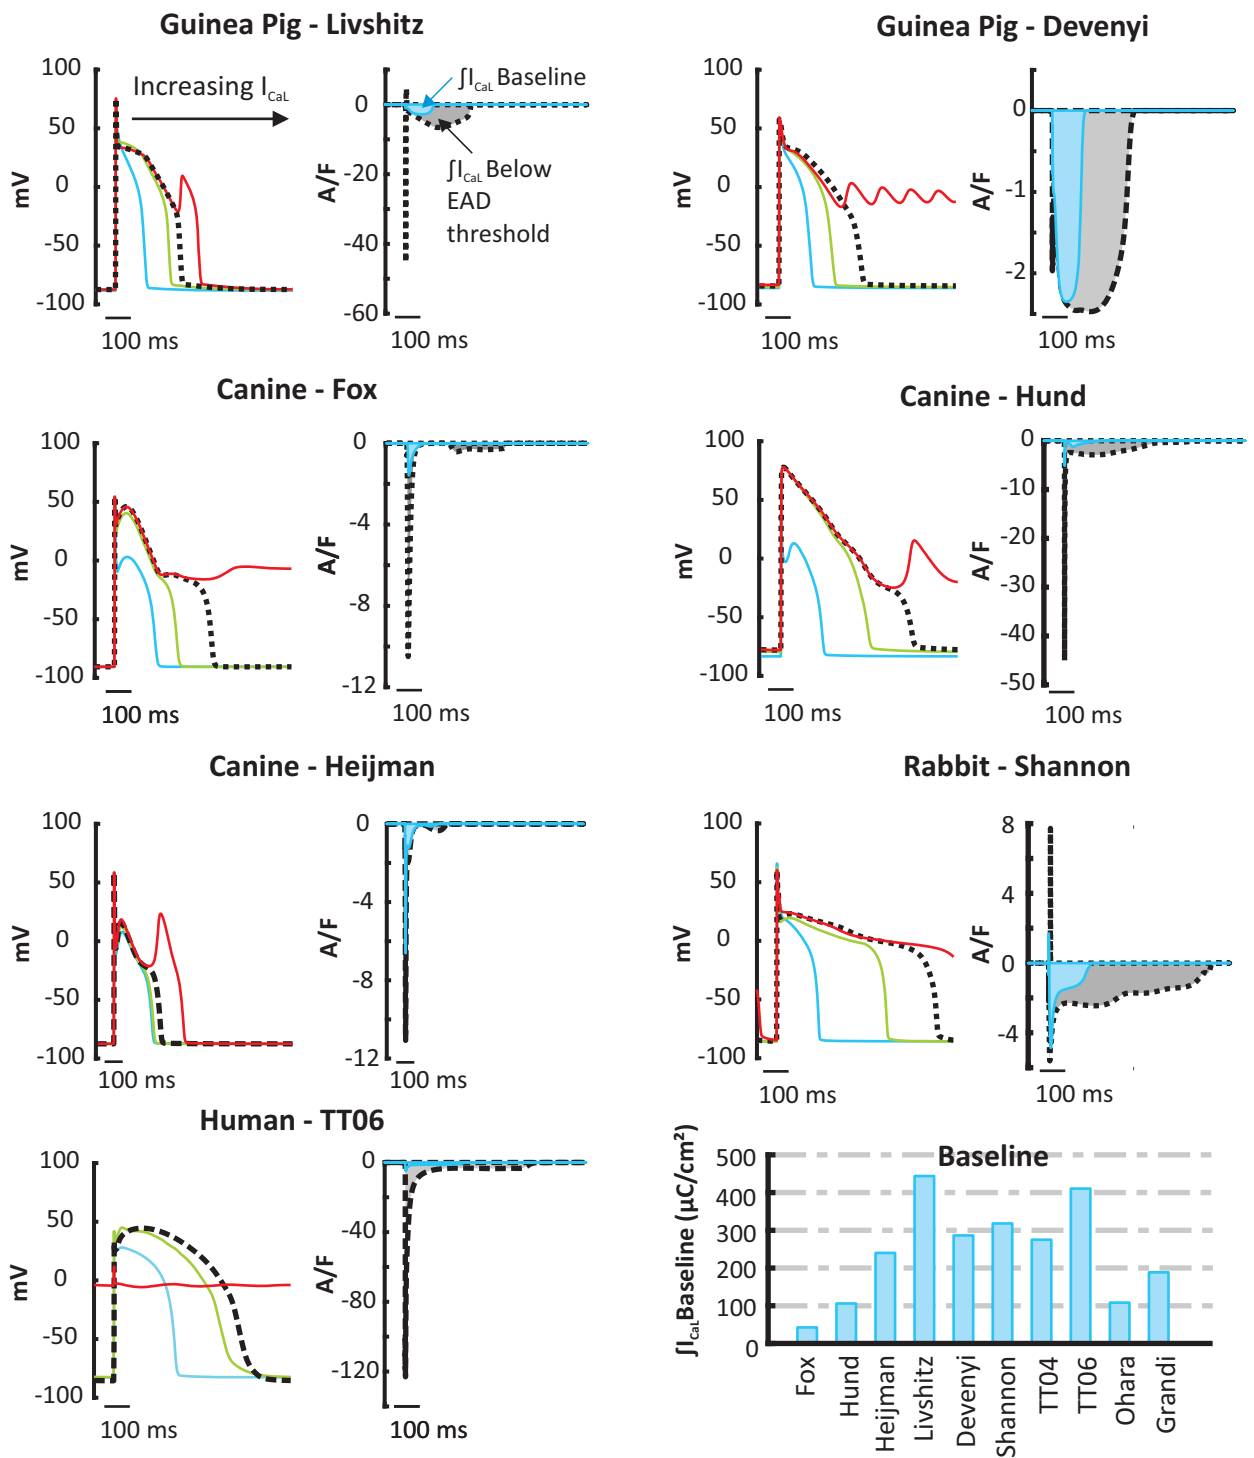

**Figure S7. Susceptibility to EADs across multiple species.**

Aps and  $I_{CaL}$  waveforms of each model with increasing  $I_{CaL}$  current. The blue curves show the baseline  $I_{CaL}$  whereas the black dashed curves plot  $I_{CaL}$  just before the first EAD occurred. The gray shaded regions are the area under the curve (AUC). Plots of Shannon and TT06 represent the 91st beat, plot of Fox is 100th beat, plot of Hund is the 99th beat, and plots of Heijman and Devenyi are the 92nd beat, while Livshitz is the 93rd beat.

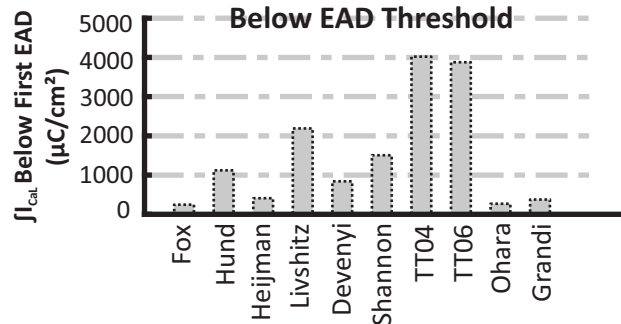

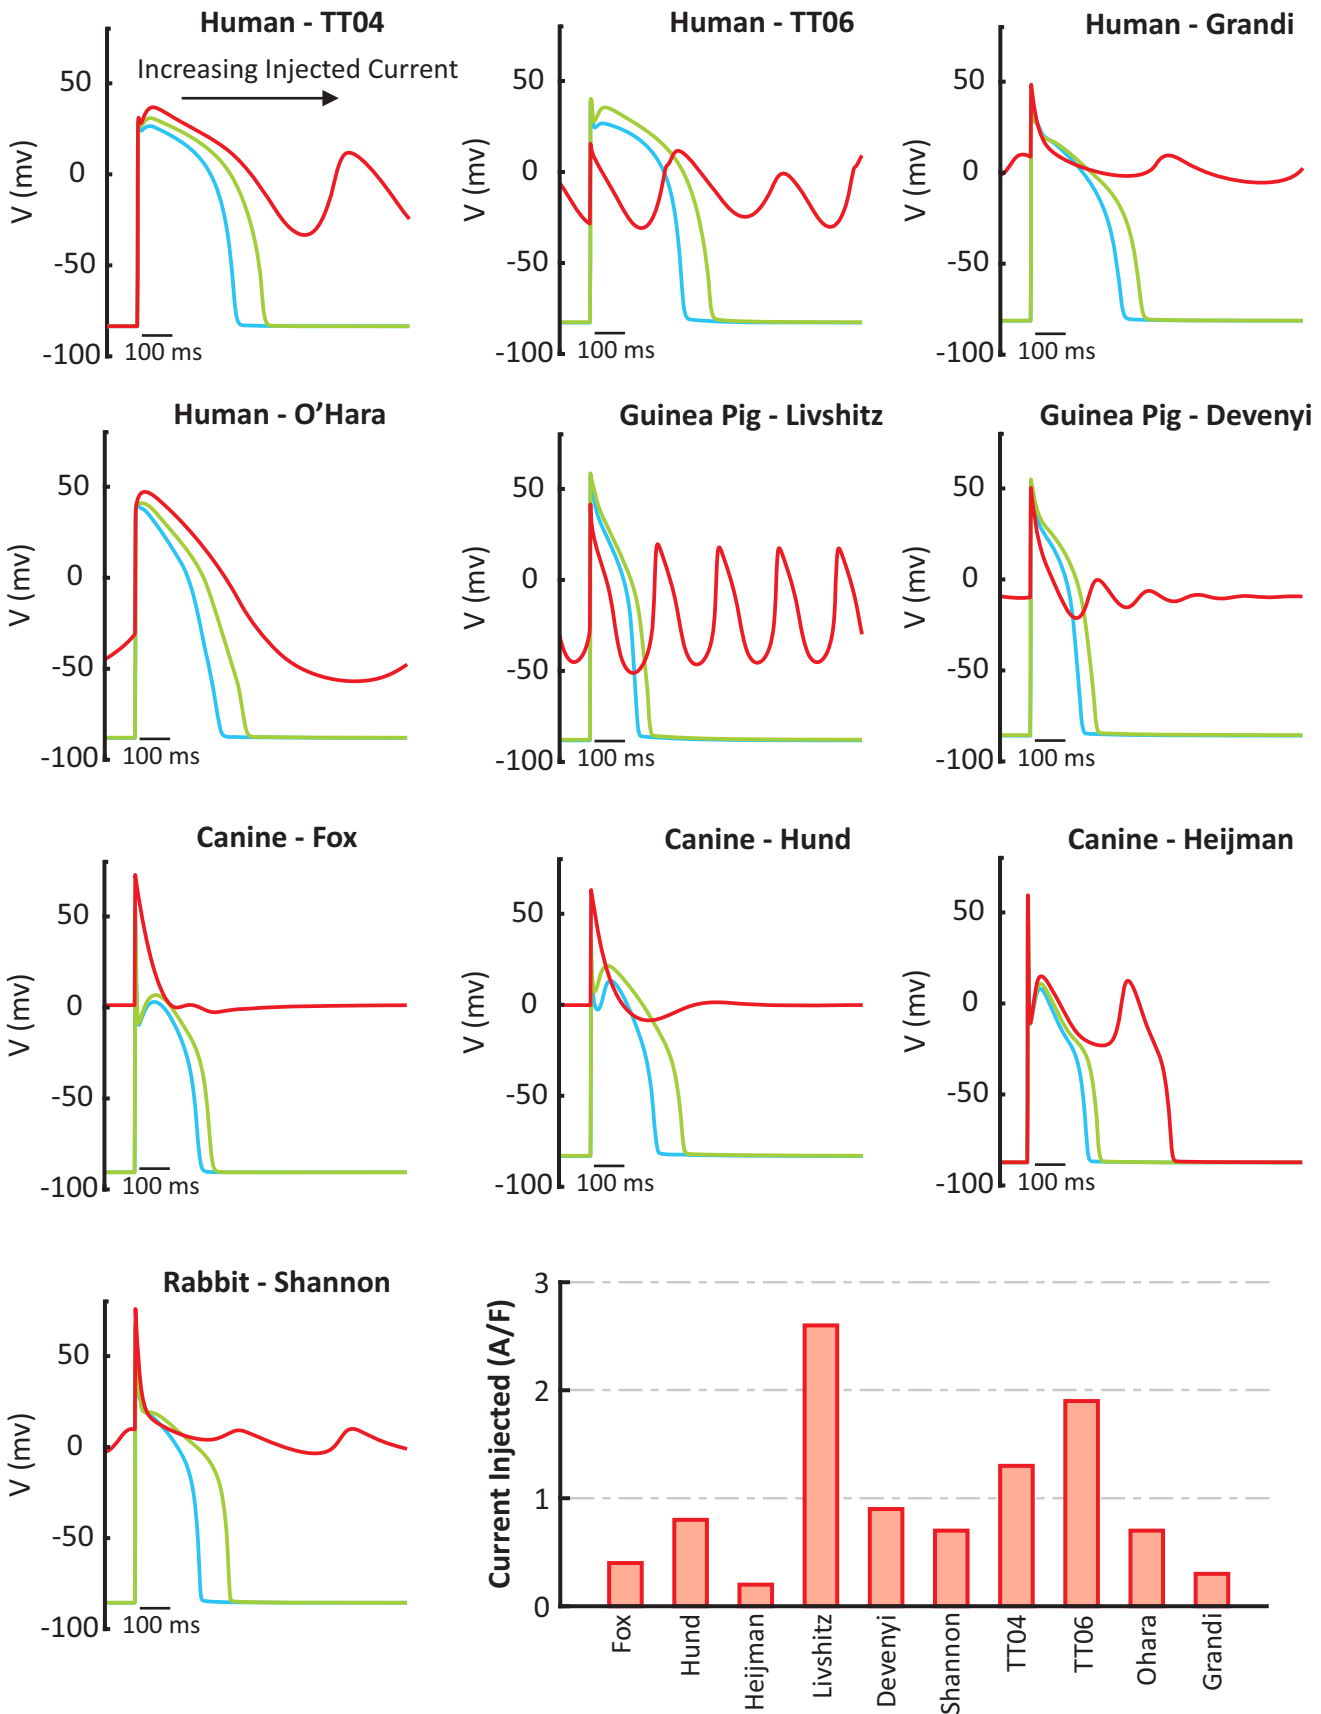

**Figure S8. Inducing proarrhythmic behavior through constant inward current inject across multiple species.** AP waveforms of each model with increasing constant inward current injection (from blue to red) until proarrhythmic behaviors were present. The bar graph represents the level of current injected in order to produce the failed APs in red in each model.

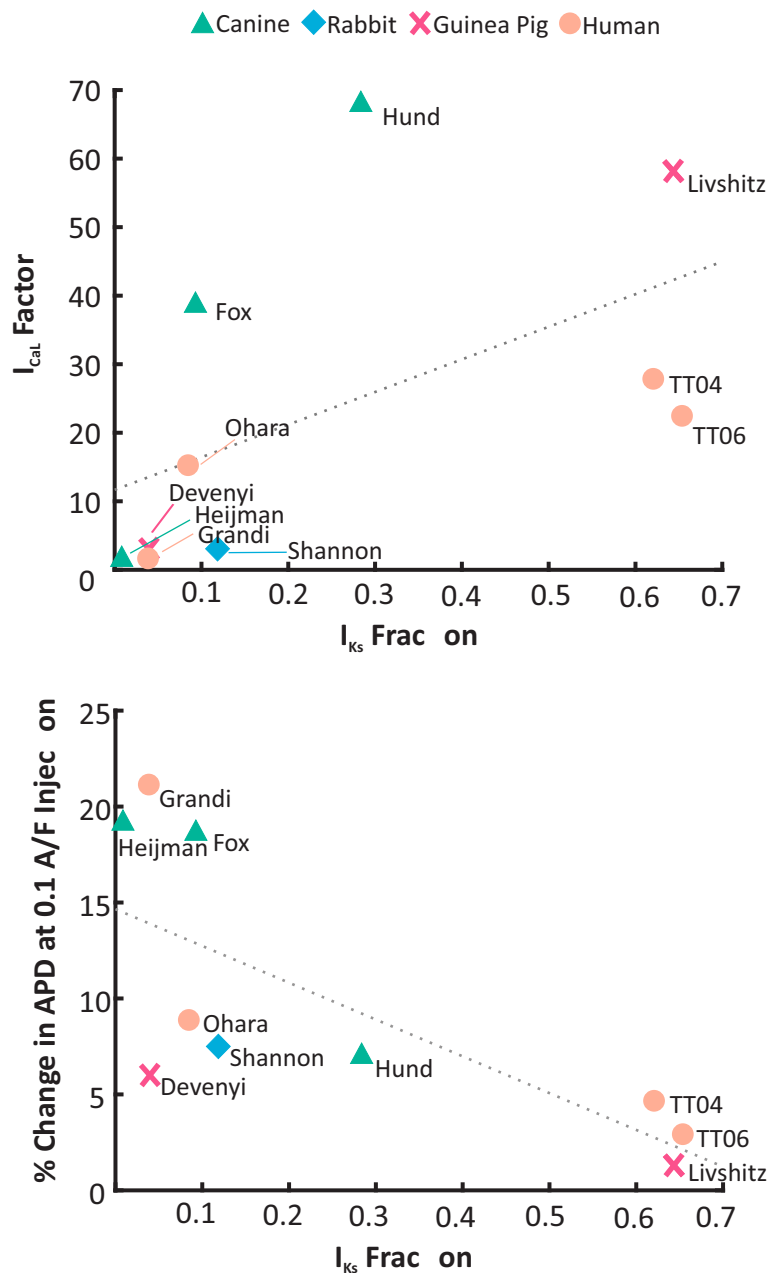

**Figure S9. Additional correlation plots**

(A) The scaling factor ( $I_{CaL}$  factor) by which the calcium current was increased does not correlate with the levels of  $I_{Ks}$ . Since the baseline  $I_{CaL}$  magnitude differed between models, the  $I_{CaL}$  factor did not provide a fair basis of comparison. To compare susceptibility to EADs, we integrated the  $I_{CaL}$  waveform at the level just under the EAD threshold as depicted in Figures 4 & 5. (B) The percent change in APD between the APD when 0.1 A/F inward current was injected into the models and the baseline APD was calculated and compared with the levels of  $I_{Ks}$ . This shows that models with low  $I_{Ks}$  are much more susceptible to APD prolongation when an arbitrary inward current is injected as compared to models with high  $I_{Ks}$ .

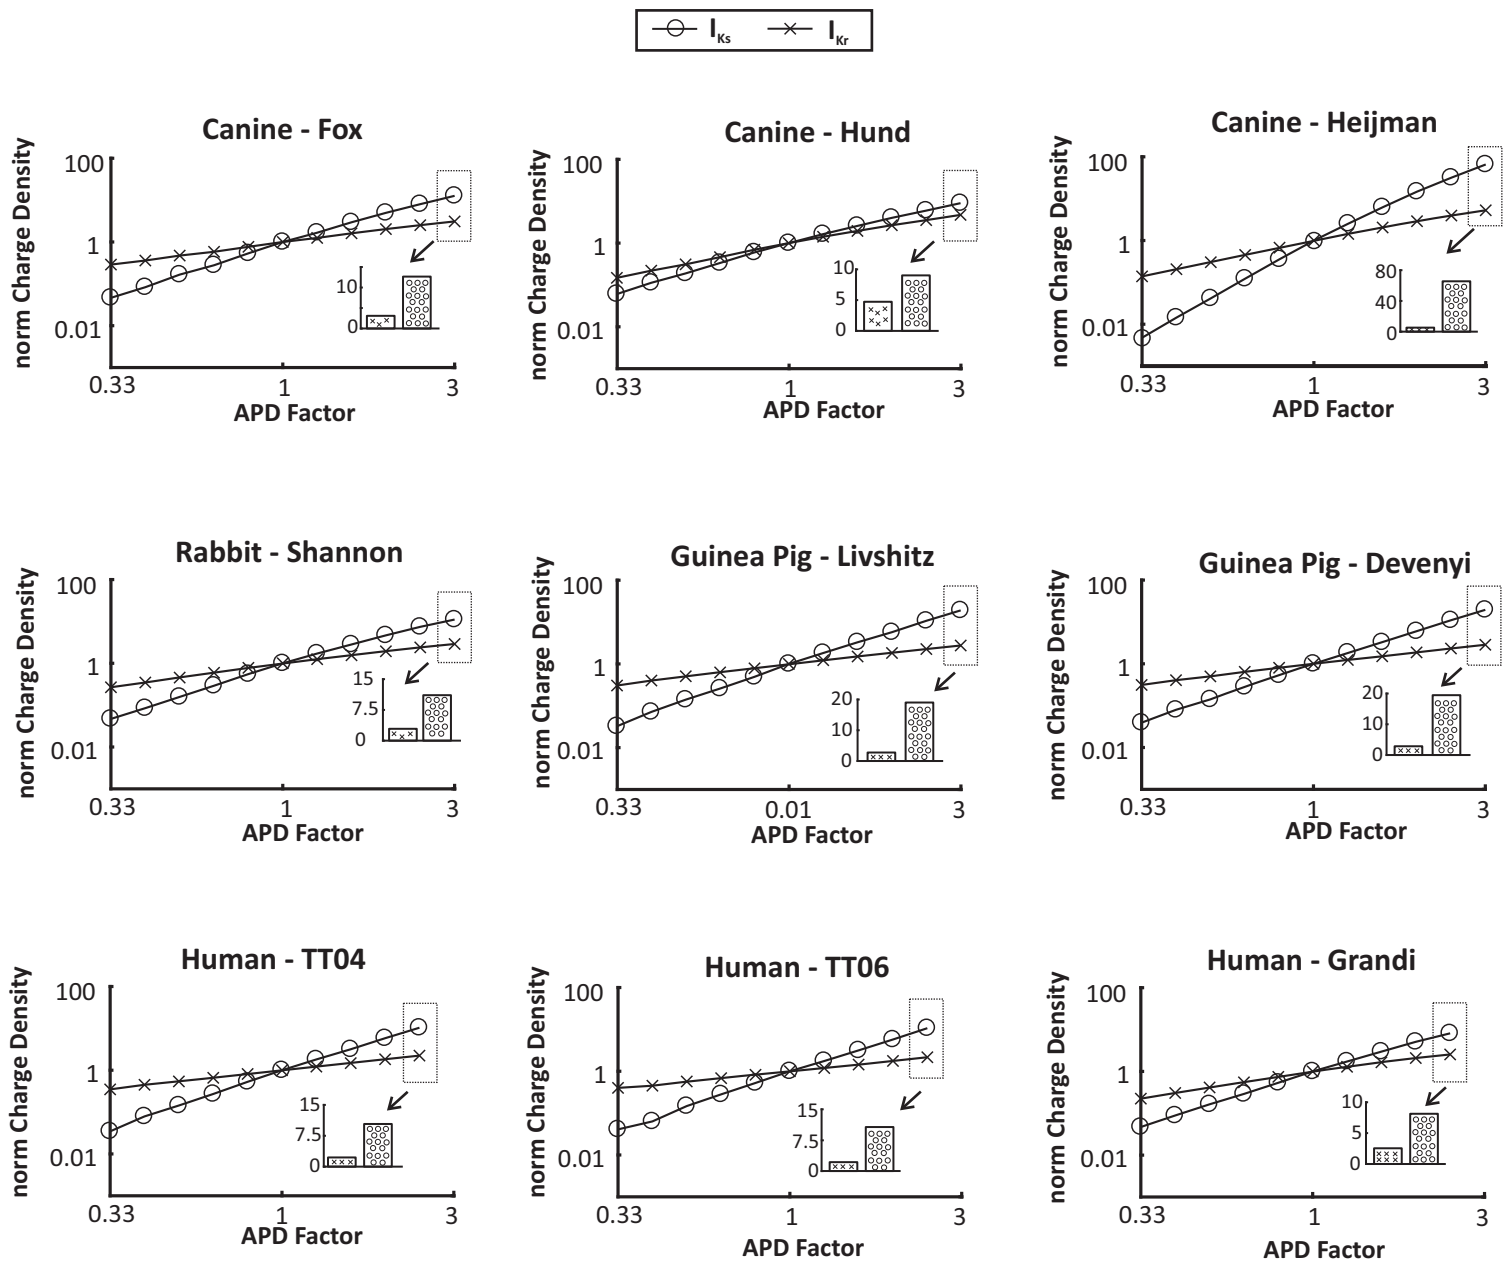

**Figure S10. AP Clamp Simulations across Models**

The AP Clamp simulation performed in Figure 6 was replicated in all the models. The x-axis refers to the factor by which the APD was increased. The y-axis represents the integrated currents (area under the curve, AUC) of each  $K^+$  currents, normalized to the integrated current of the baseline AP. As APD increases, there is a much greater relative increase in  $I_{Ks}$  compared with  $I_{Kr}$  across all models. The x marked lines represent  $I_{Kr}$  and the circle marked lines represent  $I_{Ks}$ . The inset in each figure represents the normalized current at the last time point in each figure. Please note that the TT04, TT06, and the Grandi models had longer baseline APDs, thus increasing the APD by a factor of 3 was not possible.

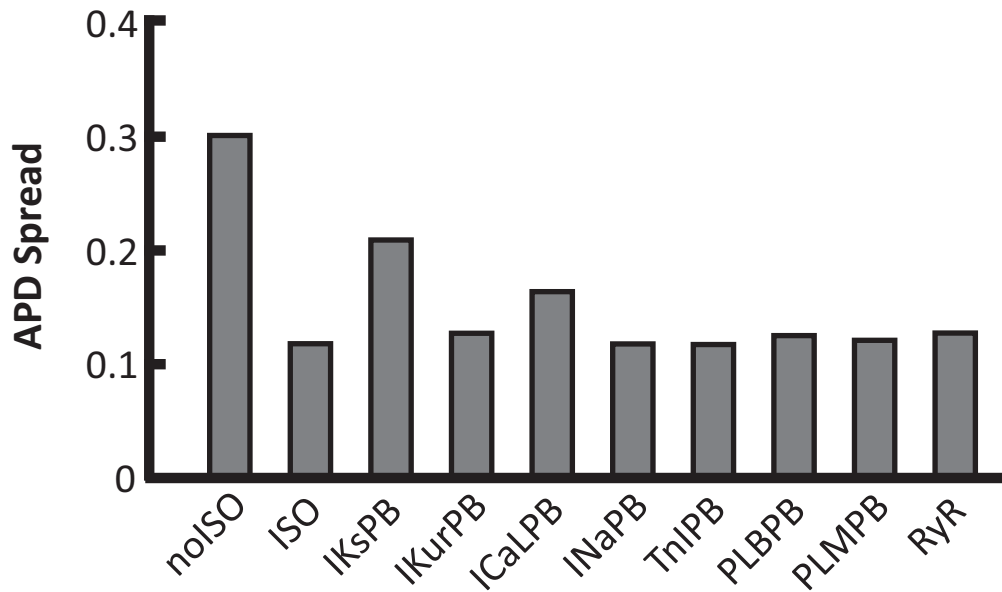

**Figure S11. Contribution of individual substrates to changes in APD Spread**

We individually blocked the phosphorylation of each of the eight PKA targets to see how this contributes to the change in APD Spread. We simulated the same population of 300 cells under the ten conditions. The no ISO population contained thirteen APs that formed EADs, which were removed from each population. Blocking IKs phosphorylation caused the greatest change in APD Spread.
